# Supplementary material for: Effects of tidal influence on the structure and function of prokaryotic communities in the sediments of a pristine Brazilian mangrove
Source: Copernicus journal article supplement (doi:10.5194/bg-18-2259-2021), 2021-04-06
Supplement: Supplementary file 1 [file bg-18-2259-2021-supplement.zip]

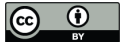

## *Supplement of*

# **Effects of tidal influence on the structure and function of prokaryotic communities in the sediments of a pristine Brazilian mangrove**

**Carolina Oliveira de Santana et al.**

*Correspondence to:* Pieter Spealman (pspealman@nyu.edu) and Carolina de Santana (cal.uefsbio@yahoo.com.br)

- bg-18-2259-2021-supplement-title-page.pdf
- Supplemental
  - SF1\_File\_Supplemental\_Materials.pdf
  - SF2\_Supplemental\_Table\_Pristine\_Mangrove\_Tidal\_Zone\_Literature\_Review.xlsx
  - SF3\_Files\_Supplemental\_QIIME2\_taxonomy\_files
    - \* ReadMe.txt
    - \* taxonomy.qzv
  - SF4\_QIIME2\_visualization
    - \* ReadMe.txt
    - \* Zhou\_full\_length\_taxa-bar-plots.qzv
    - \* feature\_table.qzv
    - \* taxa-bar-plots.qzv
  - SF5\_Collected\_analysis\_metadata
    - \* Environmental\_Variables.csv
    - \* MappingFile\_Mangrove.csv
    - \* MappingFile\_Zhou.csv
  - SF6\_Collected\_analysis\_scripts
    - \* Aldex\_run.r
    - \* Novembro\_run.sh
    - \* PICRUST2\_run.sh
    - \* QIIME2\_run.sh
    - \* Read\_preprocessing.sh
    - \* Sigilo\_run.sh
    - \* Vegan.r
    - \* Vegan\_capscale.r
    - \* Zhou\_QIIME2\_run\_v2.sh

- \* juntar.py
- \* novembro.py
- \* sigilo.py
- SF7\_Supplemental\_Intermediary\_Files
  - \* KEGG\_Mapper\_Reconstruction.tab
  - \* KO\_taxa\_specific\_enrichment.tab
  - \* Normalized\_taxa\_abundance\_family.tab
- Supporting\_Information.pdf

The copyright of individual parts of the supplement might differ from the article licence.
