# Supplementary material for: Effects of tidal influence on the structure and function of prokaryotic communities in the sediments of a pristine Brazilian mangrove
Source: Copernicus journal article supplement (doi:10.5194/bg-18-2259-2021), 2021-04-06
Supplement: Supplementary file 3 [file bg-18-2259-2021-supplement.zip]

## Supporting Information

**S1 File. SF1\_File\_Supplemental\_Materials.pdf** Contains supplemental figures (1-13), supplemental methods, and tables (1-4).

**S2 File. SF2\_File\_Pristine\_Mangrove\_Tidal\_Zone\_Literature\_Review.odt** - Here we present a short literature review of prokaryotic community studies that have focused on Impacted and Pristine Mangroves or which have studied differences between the tidal zone microhabitats.

**S3 File. SF3\_Files\_Supplemental\_QIIME2\_visualization.zip** - Visualization files capable of being viewed interactively using <https://view.qiime2.org/>:

**ReadMe.txt** - Internal nomenclature.

**Feature\_table.qzv** - a visualization of Feature ID (aka ASV) within samples.

**Taxa-bar-plots.qzv** - a visualization of taxa proportion per taxonomic level per site.

**Zhou\_taxa-bar-plots.qzv** - a visualization of taxa proportion per taxonomic level per site including data from Zhou et al. 2017.

**S4 File. SF4\_Files\_Supplemental\_QIIME2\_taxonomy\_files.zip** - Visualization files capable of being viewed interactively using <https://view.qiime2.org/>:

**ReadMe.txt** - Internal nomenclature.

**Taxonomy.qzv** - visualization of the assigned taxa for each Feature ID.

**S5 File. SF5\_Files\_Supplemental\_Metadata.zip** - This zipped folder contains metadata necessary to run QIIME2 and Vegan.

**Environmental\_Variables.csv** - tab-separated table containing the environmental variable data (Supplemental Table 3) used by Vegan metaMDS, envfit.

**MappingFile\_Mangrove.csv** - tab-separated table containing the replicate and site metadata for QIIME2.

**Zhou\_MappingFile\_Mangrove.csv** - tab-separated table containing the replicate and site metadata for this study and Zhou et al. 2017.

**S6 File. SF6\_Files\_Supplemental\_Scripts.zip** - This zipped folder contains all Shell, Python, and R scripts used in this paper.

**Aldex\_run.r** - R script for running ALDEx2 to calculate significant differences in KO abundance between sites.

**juntar.py** - python script for combining vsearch and paired-end reads. Used in 'Read\_preprocessing.sh'

**novembro.py** - python script for performing taxa abundance analysis. Used in 'Novembro\_run.sh'

**Novembro\_run.sh** - shell script for running novembro.py

**PICRUST2\_run.sh** - shell script for running PICRUST2

**QIIME2\_run.sh** - shell script for running QIIME2

**Read\_preprocessing.sh** - shell script for running QIIME2 vsearch and juntar.py

**sigilo.py** - python script for generating visualizations and analysis of PICRUST2 data.

**Sigilo\_run.sh** - shell script for running sigilo.py

**Vegan.r** - R script for running, metaMDS, envfit, and capscale.

**Zhou\_QIIME2\_run\_v2.sh** - shell script for running QIIME2 analysis on Zhou et al 2017.

**S7 File. SF7\_Files\_Supplemental\_Intermediary\_Files.zip** - Several files containing intermediate data used in the analysis of the data.

**Normalized\_taxa\_abundance\_family.tab** - Tab-separated value table containing the normalized abundances for each family taxa. Columns are Taxa, Normalized abundances for Sublittoral, Intertidal, and Supralittoral, followed by Bonferroni corrected p-value calculations for binomial exact test between sites.

**KO\_taxa\_specific\_enrichment.tab** - Tab-separated value table representing the output of sigilo script using labelled metabolic\_KOs (from Supplemental File SF1). Columns are KO, Log10 transformed predicted functional abundance in Sublittoral, Intertidal, and Supralittoral.

**KEGG Mapper\_Reconstruction.tab** - Tab-separated value table representing the output of KEGG Mapper Reconstruction performed on the significantly enriched KOs per zone identified using sigilo. Columns are Taxa, Zone, and Tab\_delimited\_modules.
